# Supplementary material for: Interaction of Periplasmic Fab Production and Intracellular Redox Balance in Escherichia coli Affects Product Yield
Source: PubMed Central journal article supplement (PMC8859853; doi:10.1021/acssynbio.1c00502), 2022-01-18

# Interaction of periplasmic Fab production and intracellular redox balance in *Escherichia coli* affects product yield

Sophie Vazulka<sup>1</sup>, Matteo Schiavinato<sup>2</sup>, Martin Wagenknecht<sup>3</sup>, Monika Cserjan-Puschmann<sup>1</sup>, Gerald Striedner<sup>1</sup>

<sup>1</sup> Christian Doppler Laboratory for production of next-level biopharmaceuticals in *E. coli*, University of Natural Resources and Life Sciences, Vienna, Department of Biotechnology, Institute of Bioprocess Science and Engineering, Muthgasse 18, 1190 Vienna, Austria

<sup>2</sup> University of Natural Resources and Life Sciences, Vienna, Department of Biotechnology, Institute of Computational Biology, Muthgasse 18, 1190 Vienna, Austria

<sup>3</sup> Boehringer Ingelheim RCV GmbH & Co KG, Dr.-Boehringer-Gasse 5-11, 1120 Vienna, Austria

**Figure S1.** % of the total, soluble Fab [mg g<sup>-1</sup>] found extracellularly in the culture supernatant over the course of fed-batch fermentations. Induction is indicated by the dashed grey line.

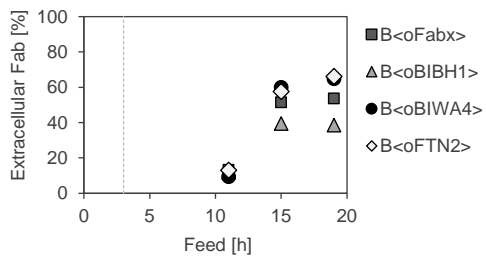

**Figure S2.** Fab fragment expression patterns obtained by fed-batch-like microtiter cultivations that were used for flow cytometric measurement of  $O_2^-$ . For comparability of the LC-specific WBs the loaded samples were adjusted to the same biomass. Soluble (1) and IB fractions (2) of cell lysates are shown.

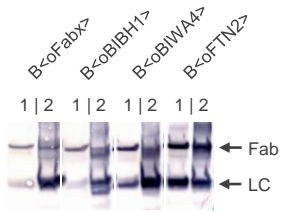

1 ... Soluble fraction  
2 ... Inclusion body

**Figure S3A.** Histograms of BL21(DE3) strains producing Fabx, BIBH1 and BIWA4 obtained from fed-batch-like microtiter cultivations after 12 h of cultivation without (0 mM IPTG) and with induction (0.5 mM IPTG) and without (-CG) and with CellROX Green staining (+CG). The positive control (BL21(DE3) treated with 350  $\mu$ M MD) is shown in all graphs.

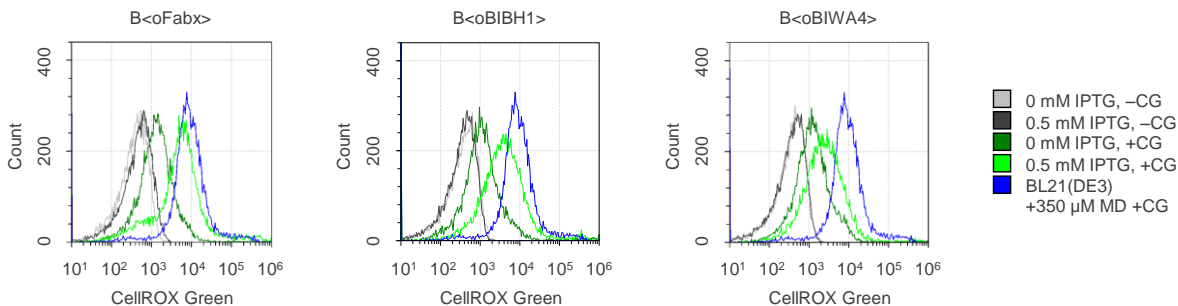

**Figure S3B.** FSC/SSC plot of B<oFabx> with and without induction.

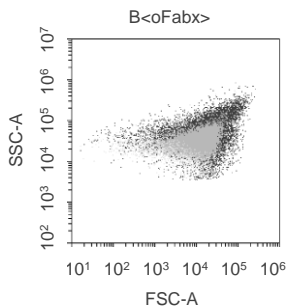

**Figure S3C.** FSC/SSC plot of B<oBIBH1>, B<oBIWA4> and B<oFTN2> with and without induction. The noninduced sample is shown with and without CellROX Green staining.

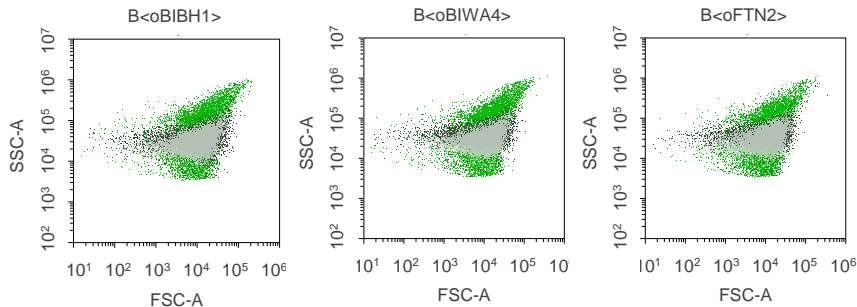

**Figure S4.** LC-specific WB of B<math>\langle\text{oFTN2}\rangle</math> shake flask cultivations without and with 5  $\mu\text{M}$  CoQ1 supplementation. Soluble (1) and IB fractions (2) and the culture supernatant (3) are shown. Samples were adjusted to the same biomass in each lane for comparability.

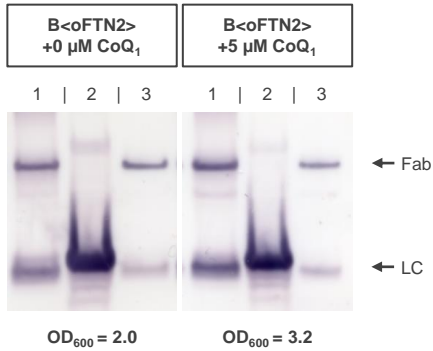

- 1 ... Soluble fraction
- 2 ... Inclusion bodies
- 3 ... Extracellular fraction

**Figure S5.** Log<sub>2</sub>FC of differentially expressed members of the SoxRS and OxyR regulons 16 h post-induction relative to the noninduced sample as determined by RNA-seq (n = 3,  $\alpha \leq 0.05$ ) for the Fab production strains and the wildtype reference BL21(DE3).

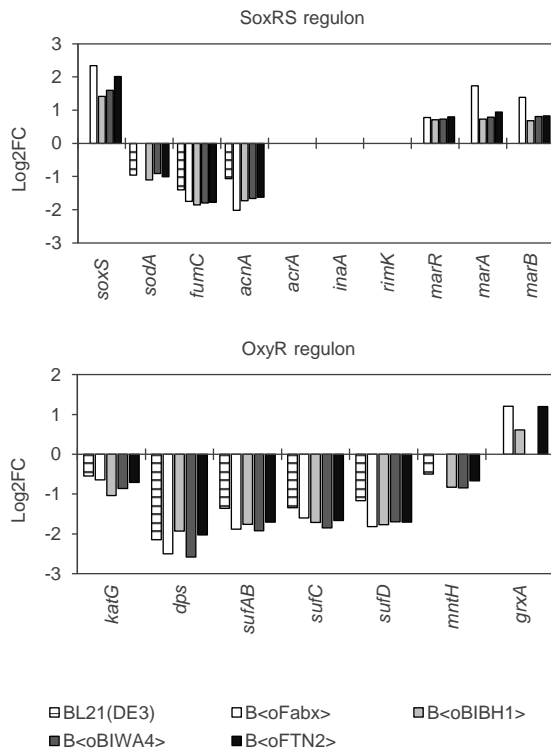

**Figure S6A.** O<sub>2</sub> in the in-gas stream [%] of fed-batch cultivations and log<sub>2</sub>FC of *soxS* transcript levels as determined by RNA-seq (n = 3,  $\alpha \leq 0.05$ ) over the course of fed-batch cultivations. A single representative cultivation is shown for the O<sub>2</sub>-enrichment of process air. Induction is indicated by the dashed grey line.

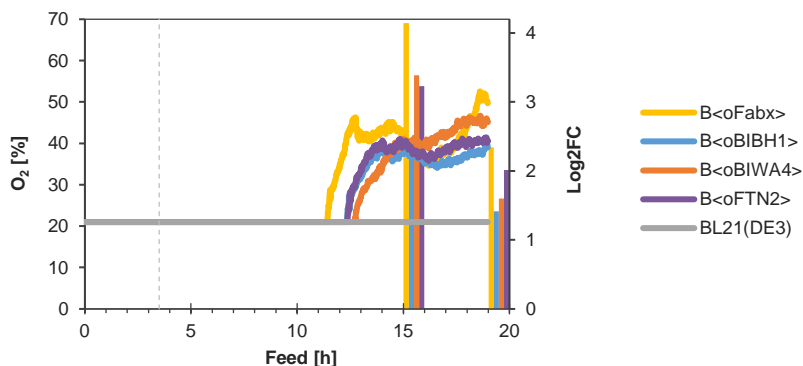

**Figure S6B.**  $\Delta \Delta$  Cq normalized gene expression of *soxS* in B<math>\langle\text{oFTN2}></math> during the course of a fed-batch cultivation as measured by qPCR in technical triplicate (n = 3).

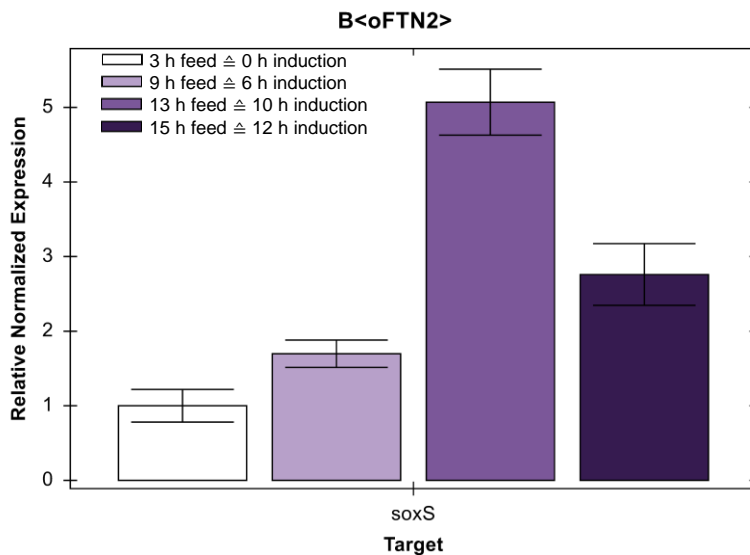

**Figure S7.** Log2FC of *sodB* and *sodC* in fed-batch cultivations relative to the noninduced sample as determined by RNA-seq ( $n = 3$ ,  $\alpha \leq 0.05$ ). Samples of the Fab production strains and the wildtype reference BL21(DE3) drawn after 2, 12 and 16 h of induction are shown.

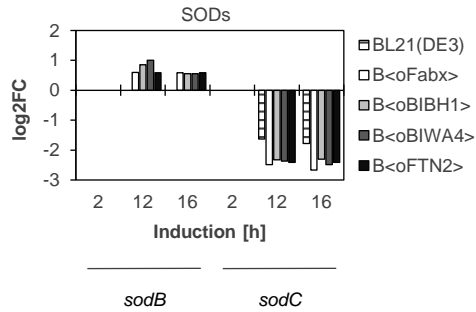



**Figure S8.** Log<sub>2</sub>FC of the *nuo* operon, *ndh* and the *ubi* genes 16 h post-induction as determined by RNA-seq ( $n = 3$ ,  $\alpha \leq 0.05$ ) for the Fab production strains and the BL21(DE3) wildtype reference strain.

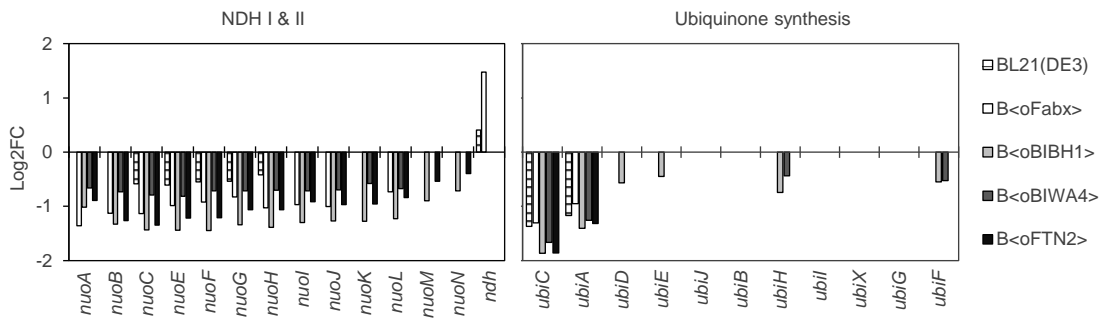

**Figure S9.** Gating of the *E. coli* population in flow cytometry data. A culture of the BL21(DE3) wildtype reference with induction is shown without and with CellROX Green staining.

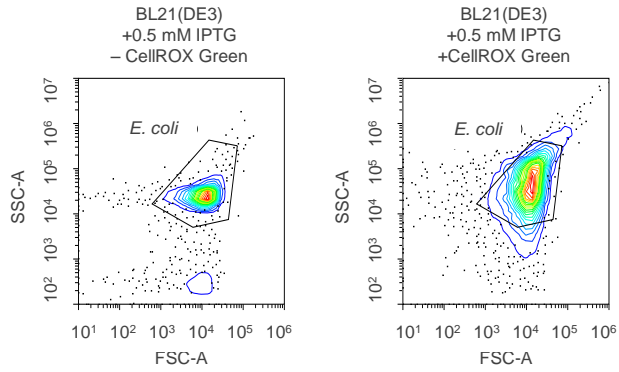

**Figure S10.** Standard curves (including primer efficiencies) and melting peaks obtained by qPCR using primers targeting *soxS* and *cysG*. All cDNA samples to be analyzed were pooled and measured in triplicate.

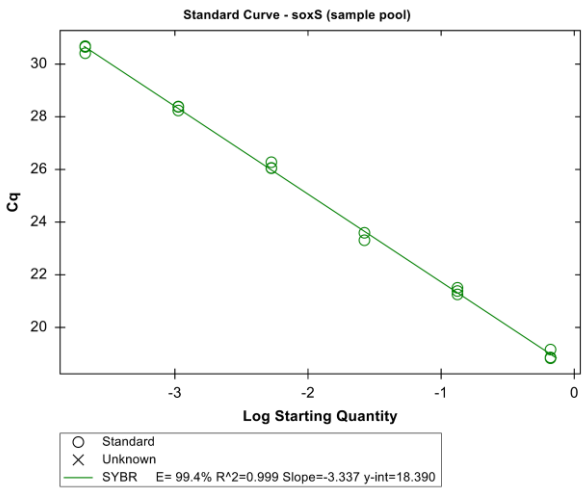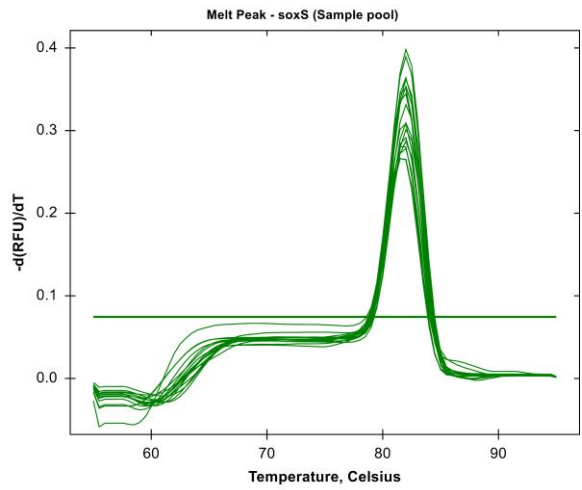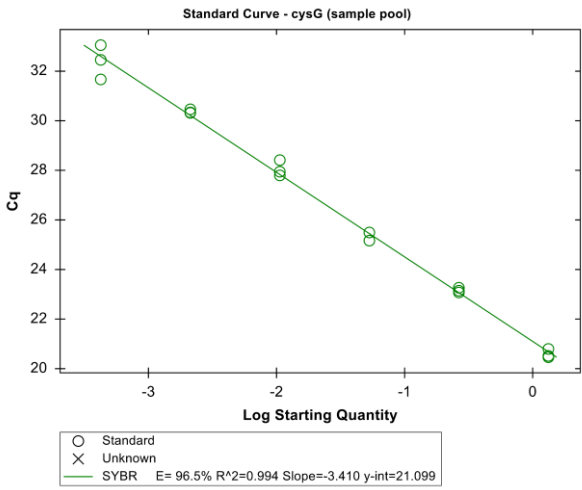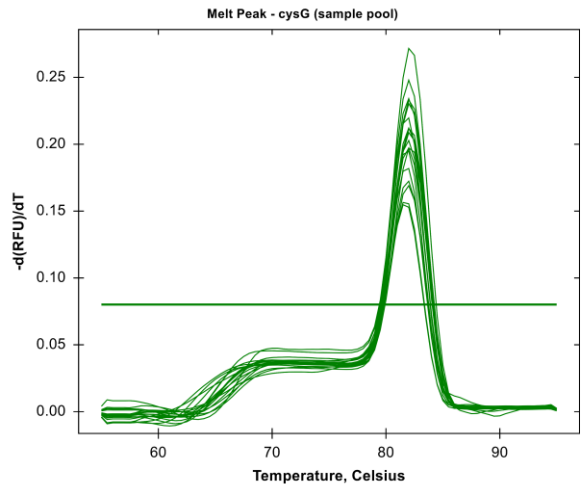

**Figure S11.** Transcript levels in transcripts per million (TPM) of *cysG* during fed-batch cultivations of Fab producers and the BL21(DE3) wildtype reference. DGE analysis (DESeq2) showed no significant ( $\alpha = 0.05$ ) changes in *cysG* expression in any of the tested strains at any timepoint relative to the noninduced sample (0 h). Samples were analyzed in biological triplicate ( $n = 3$ , Mean + SEM).

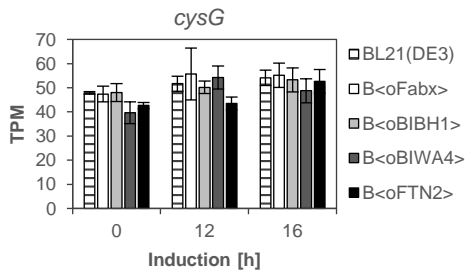

Supplement: sb1c00502_si_001.pdf [file sb1c00502_si_001.pdf]
