# Supplementary material for: Interaction of Periplasmic Fab Production and Intracellular Redox Balance in Escherichia coli Affects Product Yield
Source: PubMed Central journal article supplement (PMC8859853; doi:10.1021/acssynbio.1c00502), 2022-01-18
Supplement: sb1c00502_si_002.pdf [file sb1c00502_si_002.pdf]

<sup>1</sup> Christian Doppler Laboratory for production of next-level biopharmaceuticals in *E. coli*, University of Natural Resources and Life Sciences, Vienna, Department of Biotechnology, Institute of Bioprocess Science and Engineering, Muthgasse 18, 1190 Vienna, Austria

<sup>2</sup> University of Natural Resources and Life Sciences, Vienna, Department of Biotechnology, Institute of Computational Biology, Muthgasse 18, 1190 Vienna, Austria

<sup>3</sup> Boehringer Ingelheim RCV GmbH & Co KG, Dr.-Boehringer-Gasse 5-11, 1120 Vienna, Austria

**Table S1: Selection of genes differentially expressed in fed-batch cultivations after 12 h of induction (n = 3,  $\alpha \leq 0.05$ ).**

| Gene        | Strain    | Log2FC | P value                |
|-------------|-----------|--------|------------------------|
| <i>ubiC</i> | BL21(DE3) | -1.06  | 6.31*10 <sup>-16</sup> |
|             | B<oFabx>  | -1.17  | 1.91*10 <sup>-7</sup>  |
|             | B<oBIBH1> | -1.31  | 1.05*10 <sup>-10</sup> |
|             | B<oBIWA4> | -0.89  | 3.25*10 <sup>-6</sup>  |
|             | B<oFTN2>  | -1.24  | 4.17*10 <sup>-12</sup> |
| <i>ubiA</i> | BL21(DE3) | -0.81  | 2.24*10 <sup>-12</sup> |
|             | B<oFabx>  | -0.89  | 2.00*10 <sup>-4</sup>  |
|             | B<oBIBH1> | -0.92  | 2.07*10 <sup>-6</sup>  |
|             | B<oBIWA4> | -0.74  | 1.77*10 <sup>-6</sup>  |
|             | B<oFTN2>  | -0.93  | 8.06*10 <sup>-10</sup> |
| <i>soxS</i> | B<oFabx>  | 4.15   | 4.98*10 <sup>-52</sup> |
|             | B<oBIBH1> | 2.36   | 1.07*10 <sup>-16</sup> |
|             | B<oBIWA4> | 3.39   | 1.96*10 <sup>-67</sup> |
|             | B<oFTN2>  | 3.23   | 1.50*10 <sup>-26</sup> |
| <i>sodA</i> | BL21(DE3) | -0.90  | 3.19*10 <sup>-8</sup>  |
|             | B<oFabx>  | 0.56   | 7.51*10 <sup>-3</sup>  |
|             | B<oBIBH1> | -0.78  | 2.14*10 <sup>-3</sup>  |
|             | B<oBIWA4> | -0.48  | 3.18*10 <sup>-3</sup>  |
|             | B<oFTN2>  | -0.91  | 2.14*10 <sup>-4</sup>  |
| <i>acrA</i> | B<oFabx>  | 0.58   | 1.18*10 <sup>-2</sup>  |
| <i>inaA</i> | B<oFabx>  | 0.70   | 2.66*10 <sup>-3</sup>  |
| <i>rimK</i> | B<oFabx>  | 0.82   | 4.64*10 <sup>-4</sup>  |
| <i>fumC</i> | BL21(DE3) | -0.92  | 3.30*10 <sup>-14</sup> |
|             | B<oFabx>  | -1.34  | 5.73*10 <sup>-9</sup>  |
|             | B<oBIBH1> | -1.53  | 6.77*10 <sup>-11</sup> |
|             | B<oBIWA4> | -1.25  | 9.98*10 <sup>-16</sup> |
|             | B<oFTN2>  | -1.43  | 1.02*10 <sup>-10</sup> |
| <i>acnA</i> | BL21(DE3) | -0.86  | 1.56*10 <sup>-16</sup> |
|             | B<oFabx>  | -1.91  | 1.16*10 <sup>-14</sup> |
|             | B<oBIBH1> | -1.62  | 1.94*10 <sup>-18</sup> |
|             | B<oBIWA4> | -1.42  | 1.28*10 <sup>-24</sup> |
|             | B<oFTN2>  | -1.55  | 2.55*10 <sup>-29</sup> |
| <i>marR</i> | B<oFabx>  | 2.75   | 1.73*10 <sup>-18</sup> |
|             | B<oBIBH1> | 1.40   | 4.23*10 <sup>-5</sup>  |
|             | B<oBIWA4> | 1.78   | 2.52*10 <sup>-16</sup> |
|             | B<oFTN2>  | 1.65   | 2.21*10 <sup>-10</sup> |
| <i>marA</i> | B<oFabx>  | 3.06   | 2.34*10 <sup>-26</sup> |
|             | B<oBIBH1> | 1.18   | 7.80*10 <sup>-6</sup>  |
|             | B<oBIWA4> | 1.87   | 3.57*10 <sup>-30</sup> |
|             | B<oFTN2>  | 1.19   | 3.64*10 <sup>-9</sup>  |

Interaction of periplasmic Fab production and intracellular redox balance in *Escherichia coli* affects product yield

Sophie Vazulka<sup>1</sup>, Matteo Schiavinato<sup>2</sup>, Martin Wagenknecht<sup>3</sup>, Monika Cserjan-Puschmann<sup>1\*</sup>, Gerald Striedner<sup>1</sup>

<sup>1</sup> Christian Doppler Laboratory for production of next-level biopharmaceuticals in *E. coli*, University of Natural Resources and Life Sciences, Vienna, Department of Biotechnology, Institute of Bioprocess Science and Engineering, Muthgasse 18, 1190 Vienna, Austria

<sup>2</sup> University of Natural Resources and Life Sciences, Vienna, Department of Biotechnology, Institute of Computational Biology, Muthgasse 18, 1190 Vienna, Austria

<sup>3</sup> Boehringer Ingelheim RCV GmbH & Co KG, Dr.-Boehringer-Gasse 5-11, 1120 Vienna, Austria

|              |           |       |                         |
|--------------|-----------|-------|-------------------------|
| <i>marB</i>  | B<oFabx>  | 2.79  | 1.32*10 <sup>-16</sup>  |
|              | B<oBIWA4> | 1.79  | 9.60*10 <sup>-18</sup>  |
|              | B<oFTN2>  | 1.01  | 6.13*10 <sup>-4</sup>   |
| <i>ybjC</i>  | B<oFabx>  | 1.04  | 1.85*10 <sup>-4</sup>   |
| <i>katG</i>  | BL21(DE3) | -0.34 | 2.57*10 <sup>-3</sup>   |
|              | B<oFabx>  | -0.71 | 1.24*10 <sup>-3</sup>   |
|              | B<oBIBH1> | -0.88 | 4.52*10 <sup>-5</sup>   |
|              | B<oBIWA4> | -0.52 | 1.29*10 <sup>-3</sup>   |
|              | B<oFTN2>  | -0.72 | 2.00*10 <sup>-7</sup>   |
| <i>dps</i>   | BL21(DE3) | -2.03 | 7.99*10 <sup>-60</sup>  |
|              | B<oFabx>  | -2.87 | 5.45*10 <sup>-30</sup>  |
|              | B<oBIBH1> | -2.42 | 7.98*10 <sup>-20</sup>  |
|              | B<oBIWA4> | -2.95 | 1.94*10 <sup>-109</sup> |
|              | B<oFTN2>  | -2.88 | 1.17*10 <sup>-72</sup>  |
| <i>sufAB</i> | BL21(DE3) | -1.32 | 2.07*10 <sup>-25</sup>  |
|              | B<oFabx>  | -1.17 | 2.14*10 <sup>-6</sup>   |
|              | B<oBIBH1> | -1.67 | 2.95*10 <sup>-15</sup>  |
|              | B<oBIWA4> | -1.67 | 7.25*10 <sup>-27</sup>  |
|              | B<oFTN2>  | -1.86 | 1.25*10 <sup>-26</sup>  |
| <i>sufC</i>  | BL21(DE3) | -1.04 | 2.35*10 <sup>-13</sup>  |
|              | B<oFabx>  | -1.25 | 4.34*10 <sup>-7</sup>   |
|              | B<oBIBH1> | -1.66 | 1.07*10 <sup>-15</sup>  |
|              | B<oBIWA4> | -1.67 | 6.05*10 <sup>-28</sup>  |
|              | B<oFTN2>  | -1.54 | 3.80*10 <sup>-22</sup>  |
| <i>sufD</i>  | BL21(DE3) | -1.02 | 4.70*10 <sup>-16</sup>  |
|              | B<oFabx>  | -1.40 | 2.76*10 <sup>-10</sup>  |
|              | B<oBIBH1> | -1.58 | 5.45*10 <sup>-16</sup>  |
|              | B<oBIWA4> | -1.54 | 1.55*10 <sup>-23</sup>  |
|              | B<oFTN2>  | -1.64 | 1.86*10 <sup>-20</sup>  |
| <i>mntH</i>  | BL21(DE3) | -0.63 | 2.20*10 <sup>-6</sup>   |
|              | B<oFabx>  | -1.26 | 1.96*10 <sup>-8</sup>   |
|              | B<oBIBH1> | -1.14 | 8.54*10 <sup>-10</sup>  |
|              | B<oBIWA4> | -1.42 | 1.50*10 <sup>-20</sup>  |
|              | B<oFTN2>  | -1.24 | 2.76*10 <sup>-14</sup>  |
| <i>grxA</i>  | B<oFabx>  | 1.47  | 9.85*10 <sup>-7</sup>   |
|              | B<oBIBH1> | 0.82  | 8.06*10 <sup>-3</sup>   |
|              | B<oBIWA4> | 0.86  | 8.91*10 <sup>-5</sup>   |
|              | B<oFTN2>  | 1.04  | 5.80*10 <sup>-4</sup>   |
| <i>sodB</i>  | B<oFabx>  | 0.60  | 8.14*10 <sup>-3</sup>   |
|              | B<oBIBH1> | 0.85  | 3.10*10 <sup>-4</sup>   |
|              | B<oBIWA4> | 1.00  | 5.73*10 <sup>-12</sup>  |
|              | B<oFTN2>  | 0.59  | 8.71*10 <sup>-5</sup>   |
| <i>sodC</i>  | BL21(DE3) | -1.63 | 4.12*10 <sup>-32</sup>  |

Interaction of periplasmic Fab production and intracellular redox balance in *Escherichia coli* affects product yield

Sophie Vazulka<sup>1</sup>, Matteo Schiavinato<sup>2</sup>, Martin Wagenknecht<sup>3</sup>, Monika Cserjan-Puschmann<sup>1\*</sup>, Gerald Striedner<sup>1</sup>

<sup>1</sup> Christian Doppler Laboratory for production of next-level biopharmaceuticals in *E. coli*, University of Natural Resources and Life Sciences, Vienna, Department of Biotechnology, Institute of Bioprocess Science and Engineering, Muthgasse 18, 1190 Vienna, Austria

<sup>2</sup> University of Natural Resources and Life Sciences, Vienna, Department of Biotechnology, Institute of Computational Biology, Muthgasse 18, 1190 Vienna, Austria

<sup>3</sup> Boehringer Ingelheim RCV GmbH & Co KG, Dr.-Boehringer-Gasse 5-11, 1120 Vienna, Austria

|             |           |       |                        |
|-------------|-----------|-------|------------------------|
|             | B<oFabx>  | -2.48 | 3.96*10 <sup>-27</sup> |
|             | B<oBIBH1> | -2.33 | 3.53*10 <sup>-26</sup> |
|             | B<oBIWA4> | -2.37 | 3.94*10 <sup>-57</sup> |
|             | B<oFTN2>  | -2.41 | 1.42*10 <sup>-55</sup> |
| <i>nuoA</i> | B<oFabx>  | -1.44 | 5.18*10 <sup>-7</sup>  |
|             | B<oBIBH1> | -0.58 | 2.00*10 <sup>-3</sup>  |
|             | B<oFTN2>  | -0.37 | 8.19*10 <sup>-3</sup>  |
| <i>nuoB</i> | B<oFabx>  | -1.50 | 6.65*10 <sup>-8</sup>  |
|             | B<oBIBH1> | -0.93 | 6.57*10 <sup>-7</sup>  |
|             | B<oBIWA4> | -0.52 | 1.67*10 <sup>-3</sup>  |
|             | B<oFTN2>  | -0.58 | 1.06*10 <sup>-4</sup>  |
| <i>nuoC</i> | B<oFabx>  | -1.61 | 6.75*10 <sup>-7</sup>  |
|             | B<oBIBH1> | -1.02 | 2.08*10 <sup>-9</sup>  |
|             | B<oBIWA4> | -0.47 | 8.00*10 <sup>-3</sup>  |
|             | B<oFTN2>  | -0.59 | 1.58*10 <sup>-3</sup>  |
| <i>nuoE</i> | B<oFabx>  | -1.60 | 4.64*10 <sup>-7</sup>  |
|             | B<oBIBH1> | -1.12 | 6.13*10 <sup>-10</sup> |
|             | B<oBIWA4> | -0.54 | 1.70*10 <sup>-3</sup>  |
|             | B<oFTN2>  | -0.67 | 8.21*10 <sup>-6</sup>  |
| <i>nuoF</i> | B<oFabx>  | -1.57 | 6.52*10 <sup>-7</sup>  |
|             | B<oBIBH1> | -1.18 | 1.03*10 <sup>-11</sup> |
|             | B<oBIWA4> | -0.55 | 2.16*10 <sup>-3</sup>  |
|             | B<oFTN2>  | -0.62 | 7.68*10 <sup>-5</sup>  |
| <i>nuoG</i> | B<oFabx>  | -1.57 | 3.35*10 <sup>-7</sup>  |
|             | B<oBIBH1> | -1.02 | 3.06*10 <sup>-8</sup>  |
|             | B<oBIWA4> | -0.52 | 3.90*10 <sup>-3</sup>  |
|             | B<oFTN2>  | -0.55 | 1.49*10 <sup>-3</sup>  |
| <i>nuoH</i> | B<oFabx>  | -1.69 | 5.10*10 <sup>-8</sup>  |
|             | B<oBIBH1> | -1.07 | 1.04*10 <sup>-8</sup>  |
|             | B<oBIWA4> | -0.59 | 1.72*10 <sup>-3</sup>  |
|             | B<oFTN2>  | -0.59 | 1.35*10 <sup>-3</sup>  |
| <i>nuoI</i> | B<oFabx>  | -1.53 | 3.44*10 <sup>-7</sup>  |
|             | B<oBIBH1> | -0.95 | 1.29*10 <sup>-5</sup>  |
|             | B<oBIWA4> | -0.59 | 5.48*10 <sup>-4</sup>  |
|             | B<oFTN2>  | -0.65 | 2.32*10 <sup>-4</sup>  |
| <i>nuoJ</i> | B<oFabx>  | -1.65 | 2.46*10 <sup>-8</sup>  |
|             | B<oBIBH1> | -1.04 | 6.00*10 <sup>-8</sup>  |
|             | B<oBIWA4> | -0.64 | 3.34*10 <sup>-4</sup>  |
|             | B<oFTN2>  | -0.59 | 1.26*10 <sup>-3</sup>  |
| <i>nuoK</i> | B<oFabx>  | -1.50 | 7.46*10 <sup>-7</sup>  |
|             | B<oBIBH1> | -0.87 | 1.72*10 <sup>-5</sup>  |
|             | B<oBIWA4> | -0.46 | 1.17*10 <sup>-2</sup>  |
|             | B<oFTN2>  | -0.51 | 6.52*10 <sup>-3</sup>  |

<sup>1</sup> Christian Doppler Laboratory for production of next-level biopharmaceuticals in *E. coli*, University of Natural Resources and Life Sciences, Vienna, Department of Biotechnology, Institute of Bioprocess Science and Engineering, Muthgasse 18, 1190 Vienna, Austria

<sup>2</sup> University of Natural Resources and Life Sciences, Vienna, Department of Biotechnology, Institute of Computational Biology, Muthgasse 18, 1190 Vienna, Austria

<sup>3</sup> Boehringer Ingelheim RCV GmbH & Co KG, Dr.-Boehringer-Gasse 5-11, 1120 Vienna, Austria

|             |           |       |                        |
|-------------|-----------|-------|------------------------|
| <i>nuoL</i> | B<oFabx>  | -1.50 | 5.20*10 <sup>-7</sup>  |
|             | B<oBIBH1> | -0.99 | 4.54*10 <sup>-7</sup>  |
|             | B<oBIWA4> | -0.58 | 1.07*10 <sup>-3</sup>  |
|             | B<oFTN2>  | -0.56 | 1.78*10 <sup>-3</sup>  |
| <i>nuoM</i> | B<oFabx>  | -1.27 | 5.85*10 <sup>-6</sup>  |
|             | B<oBIBH1> | -0.79 | 4.05*10 <sup>-5</sup>  |
|             | B<oFTN2>  | -0.41 | 4.78*10 <sup>-3</sup>  |
| <i>nuoN</i> | B<oFabx>  | -0.83 | 6.19*10 <sup>-4</sup>  |
|             | B<oBIBH1> | -0.67 | 3.03*10 <sup>-4</sup>  |
| <i>ndh</i>  | B<oFabx>  | 1.73  | 9.46*10 <sup>-12</sup> |
|             | B<oBIWA4> | 0.56  | 5.52*10 <sup>-4</sup>  |

**Table S2: GO terms enriched (level 5) in B<oFabx> after 12 h of production in fed-batch processes.**

| Enriched GO term                                | Q value                                                   | Gene count             |    |
|-------------------------------------------------|-----------------------------------------------------------|------------------------|----|
| Cellular component                              | GO:0022626 cytosolic_ribosome                             | 1.85*10 <sup>-20</sup> | 55 |
|                                                 | GO:0044391 ribosomal_subunit                              | 1.85*10 <sup>-20</sup> | 55 |
|                                                 | GO:0043232 intracellular_non-membrane-bounded_organelle   | 2.87*10 <sup>-18</sup> | 67 |
|                                                 | GO:0044445 cytosolic_part                                 | 2.54*10 <sup>-13</sup> | 60 |
|                                                 | GO:0030964 NADH_dehydrogenase_complex                     | 1.16*10 <sup>-4</sup>  | 14 |
|                                                 | GO:0070470 plasma_membrane_respiratory_chain              | 1.14*10 <sup>-4</sup>  | 18 |
|                                                 | GO:0098803 respiratory_chain_complex                      | 1.14*10 <sup>-4</sup>  | 18 |
|                                                 | GO:0045272 plasma_membrane_respiratory_chain_complex_I    | 2.08*10 <sup>-4</sup>  | 13 |
|                                                 | GO:0098797 plasma_membrane_protein_complex                | 2.34*10 <sup>-2</sup>  | 64 |
| Molecular function                              | GO:0003723 RNA_binding                                    | 4.33*10 <sup>-6</sup>  | 60 |
|                                                 | GO:0003954 NADH_dehydrogenase_activity                    | 2.02*10 <sup>-3</sup>  | 16 |
| Biological process                              | GO:0022618 ribonucleoprotein_complex_assembly             | 3.68*10 <sup>-13</sup> | 47 |
|                                                 | GO:0071826 ribonucleoprotein_complex_subunit_organization | 3.68*10 <sup>-13</sup> | 48 |
|                                                 | GO:0070925 organelle_assembly                             | 7.75*10 <sup>-13</sup> | 52 |
|                                                 | GO:0008652 cellular_amino_acid_biosynthetic_process       | 3.65*10 <sup>-5</sup>  | 65 |
|                                                 | GO:1901605 alpha-amino_acid_metabolic_process             | 9.65*10 <sup>-4</sup>  | 83 |
|                                                 | GO:0009408 response_to_heat                               | 6.30*10 <sup>-3</sup>  | 36 |
|                                                 | GO:0044275 cellular_carbohydrate_catabolic_process        | 2.73*10 <sup>-2</sup>  | 27 |
| GO:0097237 cellular_response_to_toxic_substance | 3.70*10 <sup>-2</sup>                                     | 12                     |    |

**Table S3: GO terms enriched (level 5) in B<oBIBH1> after 12 h of production in fed-batch processes.**

| Enriched GO term   | Q value                                      | Gene count             |    |
|--------------------|----------------------------------------------|------------------------|----|
| Cellular component | GO:0022626 cytosolic_ribosome                | 9.01*10 <sup>-14</sup> | 44 |
|                    | GO:0044391 ribosomal_subunit                 | 9.01*10 <sup>-14</sup> | 44 |
|                    | GO:0044446 intracellular_organelle_part      | 8.69*10 <sup>-12</sup> | 46 |
|                    | GO:0044445 cytosolic_part                    | 2.23*10 <sup>-10</sup> | 48 |
|                    | GO:0070470 plasma_membrane_respiratory_chain | 1.19*10 <sup>-6</sup>  | 18 |

<sup>1</sup> Christian Doppler Laboratory for production of next-level biopharmaceuticals in *E. coli*, University of Natural Resources and Life Sciences, Vienna, Department of Biotechnology, Institute of Bioprocess Science and Engineering, Muthgasse 18, 1190 Vienna, Austria

<sup>2</sup> University of Natural Resources and Life Sciences, Vienna, Department of Biotechnology, Institute of Computational Biology, Muthgasse 18, 1190 Vienna, Austria

<sup>3</sup> Boehringer Ingelheim RCV GmbH & Co KG, Dr.-Boehringer-Gasse 5-11, 1120 Vienna, Austria

|                    |                                                           |                       |    |
|--------------------|-----------------------------------------------------------|-----------------------|----|
|                    | GO:0098803 respiratory_chain_complex                      | 1.19*10 <sup>-6</sup> | 18 |
|                    | GO:0045271 respiratory_chain_complex_I                    | 5.33*10 <sup>-6</sup> | 13 |
|                    | GO:0045272 plasma_membrane_respiratory_chain_complex_I    | 5.33*10 <sup>-6</sup> | 13 |
|                    | GO:0098797 plasma_membrane_protein_complex                | 1.17*10 <sup>-2</sup> | 51 |
|                    | GO:0030288 outer_membrane-bounded_periplasmic_space       | 2.02*10 <sup>-2</sup> | 54 |
| Molecular function | GO:0003954 NADH_dehydrogenase_activity                    | 5.42*10 <sup>-4</sup> | 15 |
|                    | GO:0070925 organelle_assembly                             | 3.27*10 <sup>-7</sup> | 40 |
| Biological process | GO:0071826 ribonucleoprotein_complex_subunit_organization | 7.73*10 <sup>-6</sup> | 34 |
|                    | GO:0042273 ribosomal_large_subunit_biogenesis             | 1.42*10 <sup>-4</sup> | 20 |
|                    | GO:0034599 cellular_response_to_oxidative_stress          | 2.85*10 <sup>-3</sup> | 18 |
|                    | GO:0097237 cellular_response_to_toxic_substance           | 2.58*10 <sup>-2</sup> | 11 |

**Table S4: GO terms enriched (level 5) in B<BIWA4> after 12 h of production in fed-batch processes.**

| Enriched GO term                                          | Q value                | Gene count |
|-----------------------------------------------------------|------------------------|------------|
| GO:0022626 cytosolic_ribosome                             | 2.76*10 <sup>-19</sup> | 55         |
| GO:0044391 ribosomal_subunit                              | 2.76*10 <sup>-19</sup> | 55         |
| GO:0043232 intracellular_non-membrane-bounded_organelle   | 6.15*10 <sup>-17</sup> | 67         |
| GO:0044445 cytosolic_part                                 | 9.02*10 <sup>-14</sup> | 62         |
| GO:0070470 plasma_membrane_respiratory_chain              | 1.96*10 <sup>-2</sup>  | 15         |
| GO:0098803 respiratory_chain_complex                      | 1.96*10 <sup>-2</sup>  | 15         |
| GO:0098797 plasma_membrane_protein_complex                | 2.35*10 <sup>-2</sup>  | 67         |
| GO:0030964 NADH_dehydrogenase_complex                     | 2.59*10 <sup>-2</sup>  | 11         |
| GO:0022618 ribonucleoprotein_complex_assembly             | 3.78*10 <sup>-11</sup> | 46         |
| GO:0071826 ribonucleoprotein_complex_subunit_organization | 3.78*10 <sup>-11</sup> | 47         |
| GO:0070925 organelle_assembly                             | 6.52*10 <sup>-11</sup> | 51         |
| GO:0008652 cellular_amino_acid_biosynthetic_process       | 1.46*10 <sup>-6</sup>  | 71         |
| GO:1901605 alpha-amino_acid_metabolic_process             | 2.88*10 <sup>-4</sup>  | 88         |
| GO:0044275 cellular_carbohydrate_catabolic_process        | 8.23*10 <sup>-3</sup>  | 29         |
| GO:0009408 response_to_heat                               | 1.23*10 <sup>-2</sup>  | 36         |
| GO:0097237 cellular_response_to_toxic_substance           | 1.23*10 <sup>-2</sup>  | 13         |
| GO:0010038 response_to_metal_ion                          | 2.04*10 <sup>-2</sup>  | 29         |

**Table S5: GO terms enriched (level 5) in B<FTN2> after 12 h of production in fed-batch processes.**

| Enriched GO term                                       | Q value                | Gene count |
|--------------------------------------------------------|------------------------|------------|
| GO:0022626 cytosolic_ribosome                          | 4.54*10 <sup>-26</sup> | 56         |
| GO:0044391 ribosomal_subunit                           | 4.54*10 <sup>-26</sup> | 56         |
| GO:0044446 intracellular_organelle_part                | 4.45*10 <sup>-21</sup> | 59         |
| GO:0044445 cytosolic_part                              | 9.54*10 <sup>-19</sup> | 62         |
| GO:0045271 respiratory_chain_complex_I                 | 3.60*10 <sup>-4</sup>  | 12         |
| GO:0045272 plasma_membrane_respiratory_chain_complex_I | 3.60*10 <sup>-4</sup>  | 12         |
| GO:0070470 plasma_membrane_respiratory_chain           | 4.03*10 <sup>-4</sup>  | 16         |

|                    |                                                           |                        |    |
|--------------------|-----------------------------------------------------------|------------------------|----|
|                    | GO:0098803 respiratory_chain_complex                      | 4.03*10 <sup>-4</sup>  | 16 |
|                    | GO:0070925 organelle_assembly                             | 7.11*10 <sup>-15</sup> | 51 |
|                    | GO:0071826 ribonucleoprotein_complex_subunit_organization | 3.64*10 <sup>-13</sup> | 45 |
|                    | GO:0042273 ribosomal_large_subunit_biogenesis             | 2.48*10 <sup>-7</sup>  | 24 |
|                    | GO:1901605 alpha-amino_acid_metabolic_process             | 1.31*10 <sup>-3</sup>  | 73 |
| Biological process | GO:0097237 cellular_response_to_toxic_substance           | 1.04*10 <sup>-2</sup>  | 12 |
|                    | GO:0010038 response_to_metal_ion                          | 1.26*10 <sup>-2</sup>  | 26 |
|                    | GO:0034599 cellular_response_to_oxidative_stress          | 2.37*10 <sup>-2</sup>  | 17 |
|                    | GO:0044275 cellular_carbohydrate_catabolic_process        | 3.08*10 <sup>-2</sup>  | 24 |
|                    | GO:0009308 amine_metabolic_process                        | 3.08*10 <sup>-2</sup>  | 18 |
|                    | GO:0009408 response_to_heat                               | 3.08*10 <sup>-2</sup>  | 30 |

**Table S6: Primers used for qPCR.**

| Target      | Sequence of forward primer | Sequence of reverse primer | Amplicon length [bp] |
|-------------|----------------------------|----------------------------|----------------------|
| <i>soxS</i> | 5'-CAAGCGTCTGATGCGTCACC-3' | 5'-CGAGCATATTGACCAGCCGC-3' | 107                  |
| <i>cysG</i> | 5'-GGTTGCTGTTAGACGCAGGC-3' | 5'-CATCTGCCCATGCGGTGAAC-3' | 78                   |
